# Supplementary material for: Crystal growth, dislocation, thermodynamic and optical properties, and electronic structure of Mg2SiO4 single crystals
Source: Royal Society of Chemistry journal article supplement (doi:10.1039/d4ce00707g), 2024-01-01
Supplement: d4ce00707g1.pdf [file d4ce00707g1.pdf]

## Crystal growth, dislocation, thermodynamic and optical properties, electronic structure of Mg<sub>2</sub>SiO<sub>4</sub> single crystal

Wenli Qian <sup>abc</sup>, Mingliang Yang <sup>abc</sup>, Qingli Zhang <sup>\*abc</sup>, Guihua Sun <sup>\*ac</sup>, Rui Zhang <sup>ad</sup>,  
Xiaofei Wang <sup>ac</sup>, Renqin Dou <sup>ac</sup>, Wenpeng Liu <sup>ac</sup>, Yu Sun <sup>ac</sup>

<sup>a</sup> Anhui Provincial Key Laboratory of Photonics Devices and Materials, Anhui Institute of Optics  
and Fine Mechanics, Hefei Institutes of Physical Science, Chinese  
Academy of Sciences, Hefei, 230031, PR China

<sup>b</sup> University of Science and Technology of China, Hefei, 230026, PR China

<sup>c</sup> Advanced Laser Technology Laboratory of Anhui Province, Hefei, 230037, PR China

<sup>d</sup> College of Chemistry and Chemical Engineering, Shanghai University of  
Engineering Science, Shanghai, 201620, PR China

**Table S1.** Calculated surface energy of the Mg<sub>2</sub>SiO<sub>4</sub> crystal on (100), (010), and (001)  
faces. (ICSD#062525) <sup>1</sup>

| Crystalline surface | Lattice period | Surface energy (eV/Å <sup>2</sup> ) | Minimum value (eV/Å <sup>2</sup> ) |
|---------------------|----------------|-------------------------------------|------------------------------------|
| (100)               | 0              | 0.158425932                         | 0.158425932                        |
|                     | 0.008          | 0.218535088                         |                                    |
|                     | 0.074          | 0.277163145                         |                                    |
|                     | 0.222          | 0.243540379                         |                                    |
|                     | 0.223          | 0.167838601                         |                                    |
|                     | 0.234          | 0.168919244                         |                                    |
|                     | 0.266          | 0.16777471                          |                                    |
|                     | 0.277          | 0.24356673                          |                                    |
|                     | 0.278          | 0.277364151                         |                                    |
|                     | 0.426          | 0.218532075                         |                                    |
|                     | 0.492          | 0.15956242                          |                                    |
|                     | 0.5            | 0.159770295                         |                                    |
|                     | 0.508          | 0.2335502                           |                                    |
|                     | 0.574          | 0.277451907                         |                                    |
|                     | 0.722          | 0.243566907                         |                                    |
|                     | 0.723          | 0.167783501                         |                                    |
|                     | 0.734          | 0.169047813                         |                                    |
|                     | 0.766          | 0.168102012                         |                                    |
|                     | 0.777          | 0.24367907                          |                                    |

|       |       |             |             |
|-------|-------|-------------|-------------|
|       | 0.778 | 0.277172548 |             |
|       | 0.926 | 0.218550025 |             |
|       | 0.992 | 0.158718862 |             |
|       | 1     | 0.158434231 |             |
|       | 0     | 0.253849312 |             |
|       | 0.053 | 0.096363552 |             |
|       | 0.092 | 0.192731639 |             |
|       | 0.094 | 0.208589091 |             |
|       | 0.163 | 0.201488775 |             |
|       | 0.223 | 0.062025912 |             |
|       | 0.277 | 0.20193574  |             |
|       | 0.337 | 0.208562134 |             |
|       | 0.406 | 0.192604797 |             |
|       | 0.408 | 0.096349304 |             |
|       | 0.447 | 0.253906433 |             |
| (010) | 0.5   | 0.253826072 | 0.061996248 |
|       | 0.553 | 0.096357563 |             |
|       | 0.592 | 0.19252851  |             |
|       | 0.594 | 0.208802361 |             |
|       | 0.663 | 0.201447647 |             |
|       | 0.723 | 0.061996248 |             |
|       | 0.777 | 0.201431299 |             |
|       | 0.837 | 0.208423731 |             |
|       | 0.906 | 0.192516133 |             |
|       | 0.908 | 0.096338057 |             |
|       | 0.947 | 0.253916437 |             |
|       | 1     | 0.253860416 |             |
|       | 0     | 0.136493261 |             |
|       | 0.033 | 0.163680952 |             |
|       | 0.25  | 0.163593889 |             |
|       | 0.467 | 0.136281502 |             |
| (001) | 0.5   | 0.136203992 | 0.136203992 |
|       | 0.533 | 0.163466    |             |
|       | 0.75  | 0.163577937 |             |
|       | 0.967 | 0.136322654 |             |
|       | 1     | 0.136418232 |             |

**Table S2.** The Raman active modes of previous results and this work.

| Modes    | Previous work <sup>2</sup> | Previous work <sup>3</sup> | This work |
|----------|----------------------------|----------------------------|-----------|
| $A_g$    | 966                        | 967                        | 966       |
|          | 856                        | -                          | 858       |
|          | 826                        | -                          | 826       |
|          | 609                        | 610                        | 610       |
|          | 546                        | 548                        | 548       |
|          | 424                        | 426                        | 423       |
|          | 340                        | 341                        | 342       |
|          | 329                        | 334                        | 332       |
|          | 305                        | 307                        | 305       |
|          | 227                        | 232                        | 229       |
|          | 183                        | 183                        | -         |
| $B_{1g}$ | 976                        | -                          | -         |
|          | 866                        | -                          | -         |
|          | 839                        | -                          | -         |
|          | 632                        | -                          | -         |
|          | 583                        | 585                        | -         |
|          | 434                        | 443                        | 436       |
|          | 418                        | -                          | -         |
|          | 318                        | -                          | 319       |
|          | 260                        | -                          | -         |
|          | 224                        | -                          | -         |
| 192      | -                          | -                          |           |
| $B_{2g}$ | 884                        | 882                        | 883       |
|          | 588                        | -                          | 590       |
|          | 441                        | -                          | -         |
|          | 368                        | -                          | -         |
|          | 324                        | -                          | -         |
|          | 244                        | 244                        | -         |
|          | 142                        | 171                        | -         |
| $B_{3g}$ | 922                        | 920                        | 922       |
|          | 595                        | 593                        | -         |
|          | 412                        | 426                        | -         |
|          | 376                        | 414                        | -         |
|          | 318                        | 376                        | -         |
|          | 272                        | -                          | -         |
|          | 226                        | -                          | -         |

## Notes and references

1. R. Van der Wal, A. Vos and A. Kirfel, *Acta Crystallographica Section B: Structural Science*, 1987, **43**, 132-143.
2. K. Kakimoto, *American Mineralogist*, 1978, **63**, 1198-1208.

3. P. Richet and F. Guyot, *Journal of Geophysical Research*, 1991, **96**, 11805-11816.
